# Supplementary material
Source: PubMed Central journal article supplement (PMC7855668)
Supplement: NIHMS1640774-supplement-125_2020_5300_MOESM1_ESM.pdf [file NIHMS1640774-supplement-125_2020_5300_MOESM1_ESM.pdf]

## Electronic Supplementary Material (ESM)

### Tables

**ESM Table 1.** Baseline characteristics of participants in the VITAL-DKD trial, by follow-up status

**ESM Table 2.** Concentrations of serum IL-6, hsCRP, and NT-proBNP at baseline and follow-up, among entire analytic population

**ESM Table 3.** Effects of vitamin D<sub>3</sub> on serum concentrations of IL-6, hsCRP, and NT-proBNP among highly adherent participants

**ESM Table 4.** Effects of *n*-3 fatty acids on serum concentrations of IL-6, hsCRP, and NT-proBNP among highly adherent participants

**ESM Table 5.** Effects of vitamin D<sub>3</sub> on serum concentrations of IL-6 across pre-specified subgroups

**ESM Table 6.** Effects of vitamin D<sub>3</sub> on serum concentrations of hsCRP across pre-specified subgroups

**ESM Table 7.** Effects of vitamin D<sub>3</sub> on serum concentrations of NT-proBNP across pre-specified subgroups

**ESM Table 8.** Effects of *n*-3 fatty acids on serum concentrations of IL-6 across pre-specified subgroups

**ESM Table 9.** Effects of *n*-3 fatty acids on serum concentrations of hsCRP across pre-specified subgroups

**ESM Table 10.** Effects of *n*-3 fatty acids on serum concentrations of NT-proBNP across pre-specified subgroups

### Figures

**ESM Fig. 1.** Correlation between IL-6, hsCRP, and NT-proBNP measurements after immediate processing versus upon processing after being frozen for 24 hours

**ESM Fig. 2.** CONSORT Flow Diagram for the Vitamin D and Omega-3 Trial to Prevent and Treat Diabetic Kidney Disease (VITAL-DKD)

**ESM Fig. 3.** Forest plot depicting effects of vitamin D<sub>3</sub> on serum concentrations of IL-6 across pre-specified subgroups (corresponding to ESM Table 5)

**ESM Fig. 4.** Forest plot depicting effects of vitamin D<sub>3</sub> on serum concentrations of hsCRP across pre-specified subgroups (corresponding to ESM Table 6)

**ESM Fig. 5.** Forest plot depicting effects of vitamin D<sub>3</sub> on serum concentrations of NT-proBNP across pre-specified subgroups (corresponding to ESM Table 7)

**ESM Fig. 6.** Forest plot depicting effects of *n*-3 fatty acids on serum concentrations of IL-6 across pre-specified subgroups (corresponding to ESM Table 8)

**ESM Fig. 7.** Forest plot depicting effects of *n*-3 fatty acids on serum concentrations of hsCRP across pre-specified subgroups (corresponding to ESM Table 9)

**ESM Fig. 8.** Forest plot depicting effects of *n*-3 fatty acids on serum concentrations of NT-proBNP across pre-specified subgroups (corresponding to ESM Table 10)

ESM Table 1. Baseline characteristics of participants in the VITAL-DKD trial, by follow-up status

| Characteristic                                               | No follow-up measurements | At least 1 follow-up measurement |
|--------------------------------------------------------------|---------------------------|----------------------------------|
| <i>N</i>                                                     | 222                       | 1090                             |
| <i>Demographics</i>                                          |                           |                                  |
| Female sex                                                   | 116 (52)                  | 493 (45)                         |
| Age, years                                                   | 66.9 (8.2)                | 67.7 (6.6)                       |
| Race & ethnicity (N = 1284)                                  |                           |                                  |
| Non-Hispanic white                                           | 129 (59)                  | 728 (68)                         |
| Black                                                        | 55 (25)                   | 223 (21)                         |
| Hispanic                                                     | 13 (6)                    | 62 (6)                           |
| Asian/Pacific Islander                                       | 8 (4)                     | 27 (3)                           |
| American Indian/Alaskan Native                               | 1 (0)                     | 12 (1)                           |
| Greater than high school education                           | 172 (77)                  | 927 (85)                         |
| <i>Medical history and lifestyle</i>                         |                           |                                  |
| Duration of diabetes, years                                  |                           |                                  |
| < 1                                                          | 4 (2)                     | 38 (3)                           |
| 1-2                                                          | 36 (16)                   | 141 (13)                         |
| 3-5                                                          | 46 (21)                   | 244 (22)                         |
| 6-10                                                         | 59 (27)                   | 301 (28)                         |
| 11-20                                                        | 49 (22)                   | 266 (24)                         |
| > 20                                                         | 27 (12)                   | 97 (9)                           |
| Current smoking                                              | 20 (9)                    | 59 (5)                           |
| Current alcohol use <sup>a</sup>                             | 100 (47)                  | 594 (55)                         |
| <i>Medication and supplement use at randomization</i>        |                           |                                  |
| Glucose-lowering medications                                 |                           |                                  |
| Biguanides                                                   | 141 (64)                  | 748 (69)                         |
| Sulfonylureas                                                | 75 (34)                   | 318 (29)                         |
| Insulin                                                      | 50 (23)                   | 208 (19)                         |
| Thiazolidinediones                                           | 17 (8)                    | 107 (10)                         |
| DPP-4 inhibitors                                             | 21 (9)                    | 94 (9)                           |
| GLP1 receptor agonists                                       | 10 (5)                    | 38 (3)                           |
| Antihypertensive medications                                 |                           |                                  |
| Number of classes                                            | 1.5 (1.2)                 | 1.4 (1.2)                        |
| ACE inhibitor or ARB                                         | 121 (55)                  | 682 (63)                         |
| ACE inhibitors                                               | 80 (36)                   | 485 (44)                         |
| Diuretics                                                    | 70 (32)                   | 294 (27)                         |
| $\beta$ -blockers                                            | 65 (29)                   | 230 (21)                         |
| Calcium channel blockers                                     | 54 (24)                   | 221 (20)                         |
| ARBs                                                         | 44 (20)                   | 216 (20)                         |
| Mineralocorticoid receptor antagonists                       | 0 (0)                     | 9 (1)                            |
| Cholesterol-lowering medication                              | 135 (62)                  | 775 (73)                         |
| Supplemental vitamin D ( $\leq$ 800 IU/day) at randomization | 63 (28)                   | 473 (43)                         |

|                                                             |                  |                  |
|-------------------------------------------------------------|------------------|------------------|
| Supplemental calcium ( $\leq 1200$ mg/day) at randomization | 44 (20)          | 268 (25)         |
| <i>Physical characteristics</i>                             |                  |                  |
| Body mass index, kg/m <sup>2</sup>                          | 32.6 (7.4)       | 31.2 (6.6)       |
| <i>Laboratory values at baseline</i>                        |                  |                  |
| Serum creatinine ( $\mu\text{mol/l}$ )                      | 73.7 (24.0)      | 76.2 (23.7)      |
| Cystatin-C (mg/l)                                           | 0.9 (0.3)        | 0.9 (0.3)        |
| Baseline eGFR (ml/min/1.73m <sup>2</sup> )                  | 87.6 (23.7)      | 85.5 (21.8)      |
| Urine ACR (mg/mmol Cr), median (IQR)                        | 0.41 (0.14-0.96) | 0.32 (0.06-0.81) |
| 25(OH)D, nmol/l                                             | 66.6 (25.8)      | 75.7 (25.0)      |
| < 50 nmol/l                                                 | 61 (28)          | 165 (16)         |
| 50 to < 75 nmol/l                                           | 79 (37)          | 377 (36)         |
| $\geq 75$ nmol/l                                            | 76 (35)          | 499 (48)         |
| IL-6 (pg/ml), median (IQR)                                  | 1.2 (0.8-1.8)    | 0.9 (0.7-1.5)    |
| hsCRP (mg/l), median (IQR)                                  | 2.6 (1.2-5.4)    | 1.8 (0.8-4.1)    |
| NT-proBNP (ng/l), median (IQR)                              | 287 (104-717)    | 260 (111-613)    |

Entries are mean (SD) for continuous variables and N (%) for categorical variables, except as noted. Percentages are calculated as percent of non-missing responses.

<sup>a</sup> Daily, weekly, or monthly use of alcohol.

DPP-4 = dipeptidyl peptidase-4; GLP-1 = glucagon-like peptide-1; ACE = angiotensin-converting enzyme; ARB = angiotensin II receptor blocker; eGFR = estimated glomerular filtration rate; ACR = albumin creatinine ratio; 25(OH)D = 25-hydroxyvitamin D; IL-6 = interleukin-6; hsCRP = high-sensitivity C-reactive protein; NT-proBNP = N-terminal pro-B-type natriuretic peptide.

ESM Table 2. Concentrations of serum IL-6, hsCRP, and NT-proBNP at baseline and follow-up, among entire analytic population (N = 1312)

| Biomarker        | N available measurements | Geometric mean (SD) <sup>a</sup> | Change from baseline to year 5 (ratio), geometric mean (SD) |
|------------------|--------------------------|----------------------------------|-------------------------------------------------------------|
| IL-6 (pg/ml)     |                          |                                  |                                                             |
| Baseline         | 1302                     | 1.21 (3.02)                      | --                                                          |
| Year 2           | 988                      | 1.35 (4.02)                      | 1.11 (4.41)                                                 |
| Year 5           | 933                      | 1.28 (3.67)                      | 1.06 (4.46)                                                 |
| hsCRP (mg/l)     |                          |                                  |                                                             |
| Baseline         | 1306                     | 1.94 (3.13)                      | --                                                          |
| Year 2           | 988                      | 1.95 (3.17)                      | 1.01 (2.70)                                                 |
| Year 5           | 916                      | 1.89 (3.37)                      | 0.97 (2.86)                                                 |
| NT-proBNP (ng/l) |                          |                                  |                                                             |
| Baseline         | 1306                     | 262 (3.7)                        | --                                                          |
| Year 2           | 989                      | 315.2 (3.8)                      | 1.2 (2.75)                                                  |
| Year 5           | 934                      | 406.6 (4.1)                      | 1.55 (3.15)                                                 |

<sup>a</sup> Values incorporate multiple imputation.

IL-6 = interleukin-6; hsCRP = high-sensitivity C-reactive protein; NT-proBNP = N-terminal pro-B-type natriuretic peptide.

ESM Table 3. Effects of vitamin D<sub>3</sub> on serum concentrations of IL-6, hsCRP, and NT-proBNP among highly adherent participants (N = 1032)<sup>a</sup>

| Biomarker        | Vitamin D <sub>3</sub> |                     |                                                   | Placebo |                     |                                                   | Difference in change from baseline <sup>b</sup>           |         |
|------------------|------------------------|---------------------|---------------------------------------------------|---------|---------------------|---------------------------------------------------|-----------------------------------------------------------|---------|
|                  | N                      | Geometric mean (SD) | Change from baseline (ratio), geometric mean (SD) | N       | Geometric mean (SD) | Change from baseline (ratio), geometric mean (SD) | Ratio of change from baseline, active to placebo (95% CI) | p-value |
| IL-6 (pg/ml)     |                        |                     |                                                   |         |                     |                                                   |                                                           |         |
| Baseline         | 539                    | 1.11 (2.87)         | 1.00 (Ref.)                                       | 484     | 1.13 (2.59)         | 1.00 (Ref.)                                       | 1.00 (Ref.)                                               |         |
| Year 2           | 481                    | 1.27 (3.75)         | 1.16 (3.98)                                       | 414     | 1.20 (3.58)         | 1.1 (4.04)                                        | 1.05 (0.87, 1.27)                                         |         |
| Year 5           | 460                    | 1.17 (3.50)         | 1.05 (4.19)                                       | 404     | 1.26 (3.42)         | 1.15 (4.04)                                       | 0.92 (0.76, 1.11)                                         | 0.36    |
| hsCRP (mg/l)     |                        |                     |                                                   |         |                     |                                                   |                                                           |         |
| Baseline         | 543                    | 1.79 (3.18)         | 1.00 (Ref.)                                       | 485     | 1.85 (2.98)         | 1.00 (Ref.)                                       | 1.00 (Ref.)                                               |         |
| Year 2           | 482                    | 1.76 (3.17)         | 1.01 (2.56)                                       | 413     | 1.87 (2.91)         | 1.03 (2.76)                                       | 0.98 (0.86, 1.11)                                         |         |
| Year 5           | 456                    | 1.60 (3.22)         | 0.92 (2.61)                                       | 392     | 1.92 (3.36)         | 1.05 (3.02)                                       | 0.88 (0.77, 1.01)                                         | 0.15    |
| NT-proBNP (ng/l) |                        |                     |                                                   |         |                     |                                                   |                                                           |         |
| Baseline         | 543                    | 245.9 (3.6)         | 1.00 (Ref.)                                       | 484     | 267.0 (3.4)         | 1.00 (Ref.)                                       | 1.00 (Ref.)                                               |         |
| Year 2           | 481                    | 318.4 (3.9)         | 1.27 (2.7)                                        | 415     | 289.3 (3.5)         | 1.12 (2.7)                                        | 1.14 (0.99, 1.30)                                         |         |
| Year 5           | 461                    | 409.3 (3.9)         | 1.69 (3.07)                                       | 404     | 359.2 (3.8)         | 1.36 (2.94)                                       | 1.24 (1.09, 1.43)                                         | 0.0067  |

<sup>a</sup> High adherence was defined as adherence to at least two-thirds of study medications.

<sup>b</sup> From a linear mixed model that includes adjustment for age, sex, baseline eGFR, and baseline urine creatinine to albumin ratio, and accounts for missing data using multiple imputation

p-value comes from a global test of the ratio of change from baseline at Years 2 and 5.

IL-6 = interleukin-6; hsCRP = high-sensitivity C-reactive protein; NT-proBNP = N-terminal pro-B-type natriuretic peptide; Ref. = reference group

ESM Table 4. Effects of *n*-3 fatty acids on serum concentrations of IL-6, hsCRP, and NT-proBNP among highly adherent participants (N = 1032)<sup>a</sup>

| Biomarker        | <i>n</i> -3 fatty acids |                     |                                                   | Placebo |                     |                                                   | Difference in change from baseline <sup>b</sup>           |         |
|------------------|-------------------------|---------------------|---------------------------------------------------|---------|---------------------|---------------------------------------------------|-----------------------------------------------------------|---------|
|                  | N                       | Geometric mean (SD) | Change from baseline (ratio), geometric mean (SD) | N       | Geometric mean (SD) | Change from baseline (ratio), geometric mean (SD) | Ratio of change from baseline, active to placebo (95% CI) | p-value |
| IL-6 (pg/ml)     |                         |                     |                                                   |         |                     |                                                   |                                                           |         |
| Baseline         | 515                     | 1.13 (2.67)         | 1.00 (Ref.)                                       | 509     | 1.13 (2.87)         | 1.00 (Ref.)                                       | 1.00 (Ref.)                                               |         |
| Year 2           | 455                     | 1.17 (3.09)         | 1.07 (3.33)                                       | 441     | 1.31 (4.24)         | 1.18 (4.74)                                       | 0.91 (0.75, 1.11)                                         |         |
| Year 5           | 438                     | 1.26 (3.72)         | 1.13 (4.16)                                       | 425     | 1.17 (3.21)         | 1.05 (4.12)                                       | 1.06 (0.87, 1.30)                                         | 0.37    |
| hsCRP (mg/l)     |                         |                     |                                                   |         |                     |                                                   |                                                           |         |
| Baseline         | 517                     | 1.91 (3.06)         | 1.00 (Ref.)                                       | 512     | 1.75 (3.12)         | 1.00 (Ref.)                                       | 1.00 (Ref.)                                               |         |
| Year 2           | 456                     | 1.86 (3.11)         | 1 (2.6)                                           | 440     | 1.81 (3.06)         | 1.04 (2.71)                                       | 0.95 (0.84, 1.09)                                         |         |
| Year 5           | 428                     | 1.72 (3.31)         | 0.92 (2.81)                                       | 419     | 1.79 (3.27)         | 1.05 (2.8)                                        | 0.87 (0.76, 0.99) <sup>c</sup>                            | 0.11    |
| NT-proBNP (ng/l) |                         |                     |                                                   |         |                     |                                                   |                                                           |         |
| Baseline         | 516                     | 280.0 (3.4)         | 1.00 (Ref.)                                       | 512     | 231.4 (3.6)         | 1.00 (Ref.)                                       | 1.00 (Ref.)                                               |         |
| Year 2           | 456                     | 363.1 (3.7)         | 1.25 (2.73)                                       | 441     | 251.9 (3.7)         | 1.15 (2.74)                                       | 1.08 (0.95, 1.23)                                         |         |
| Year 5           | 438                     | 428.1 (3.9)         | 1.51 (2.91)                                       | 426     | 346.5 (3.8)         | 1.56 (3.18)                                       | 0.98 (0.85, 1.12)                                         | 0.29    |

<sup>a</sup> High adherence was defined as adherence to at least two-thirds of study medications.

<sup>b</sup> From a linear mixed model that includes adjustment for age, sex, baseline eGFR, and baseline urine creatinine to albumin ratio, and accounts for missing data using multiple imputation

<sup>c</sup> p-value = 0.04 for ratio of change from baseline at Year 5

p-value comes from a global test of the ratio of change from baseline at Years 2 and 5.

IL-6 = interleukin-6; hsCRP = high-sensitivity C-reactive protein; NT-proBNP = N-terminal pro-B-type natriuretic peptide; Ref. = reference group

ESM Table 5. Effects of vitamin D<sub>3</sub> on serum concentrations of IL-6 across pre-specified subgroups

| Category                                      | Vitamin D <sub>3</sub> |                                               | Placebo          |                                               | Ratio of change<br>(95% CI) | p-value for<br>interaction <sup>b</sup> |
|-----------------------------------------------|------------------------|-----------------------------------------------|------------------|-----------------------------------------------|-----------------------------|-----------------------------------------|
|                                               | N at<br>baseline       | Geometric<br>mean (SD)<br>change <sup>a</sup> | N at<br>baseline | Geometric<br>mean (SD)<br>change <sup>a</sup> |                             |                                         |
| Overall                                       |                        | 1.03 (4.45)                                   |                  | 1.09 (4.43)                                   | 0.96 (0.79, 1.16)           |                                         |
| Race                                          |                        |                                               |                  |                                               |                             |                                         |
| White                                         | 451                    | 1.1 (4.11)                                    | 406              | 1.08 (4.21)                                   | 1.01 (0.80, 1.27)           | 0.74                                    |
| Black                                         | 148                    | 0.9 (5.54)                                    | 130              | 1.07 (4.57)                                   | 0.86 (0.57, 1.31)           |                                         |
| Baseline UACR<br>(mg/mmol Cr)                 |                        |                                               |                  |                                               |                             |                                         |
| < 3                                           | 627                    | 1.04 (4.54)                                   | 557              | 1.09 (4.49)                                   | 0.96 (0.79, 1.18)           | 0.88                                    |
| ≥ 3                                           | 75                     | 0.96 (3.79)                                   | 52               | 1.07 (3.89)                                   | 0.91 (0.48, 1.76)           |                                         |
| Baseline 25(OH)D<br>(nmol/l)                  |                        |                                               |                  |                                               |                             |                                         |
| < 50                                          | 128                    | 0.93 (4.26)                                   | 98               | 0.98 (3.66)                                   | 0.95 (0.60, 1.51)           | 0.80                                    |
| 50 to < 75                                    | 244                    | 1.02 (4.36)                                   | 212              | 1.15 (4.60)                                   | 0.89 (0.66, 1.21)           |                                         |
| ≥ 75                                          | 300                    | 1.10 (4.62)                                   | 275              | 1.08 (4.60)                                   | 1.02 (0.77, 1.35)           |                                         |
| Baseline eGFR<br>(ml/min/1.73m <sup>2</sup> ) |                        |                                               |                  |                                               |                             |                                         |
| ≥ 60                                          | 612                    | 1.02 (4.35)                                   | 531              | 1.11 (4.17)                                   | 0.93 (0.76, 1.14)           | 0.40                                    |
| < 60                                          | 89                     | 1.14 (5.44)                                   | 76               | 0.95 (6.41)                                   | 1.18 (0.70, 1.98)           |                                         |
| Body mass index<br>(kg/m <sup>2</sup> )       |                        |                                               |                  |                                               |                             |                                         |
| < 25                                          | 87                     | 1.07 (3.32)                                   | 87               | 0.87 (4.65)                                   | 1.23 (0.76, 1.99)           | 0.44                                    |
| 25 to < 30                                    | 228                    | 0.97 (4.31)                                   | 205              | 1.15 (4.56)                                   | 0.85 (0.61, 1.17)           |                                         |
| ≥ 30                                          | 364                    | 1.07 (4.83)                                   | 294              | 1.11 (4.27)                                   | 0.97 (0.74, 1.27)           |                                         |
| Baseline IL-6<br>(pg/ml)                      |                        |                                               |                  |                                               |                             |                                         |
| < 0.8                                         | 248                    | 1.55 (2.50)                                   | 217              | 1.72 (3.48)                                   | 0.91 (0.68, 1.22)           | 0.70                                    |
| 0.8 to < 1.3                                  | 217                    | 1.14 (2.93)                                   | 179              | 1.30 (3.50)                                   | 0.88 (0.63, 1.24)           |                                         |
| ≥ 1.3                                         | 231                    | 0.61 (7.94)                                   | 210              | 0.58 (5.36)                                   | 1.07 (0.75, 1.51)           |                                         |
| <i>n</i> -3 fatty acid<br>randomization       |                        |                                               |                  |                                               |                             |                                         |
| Placebo                                       | 333                    | 0.97 (4.47)                                   | 320              | 1.07 (4.69)                                   | 0.89 (0.68, 1.17)           | 0.49                                    |
| <i>n</i> -3 FA                                | 370                    | 1.10 (4.44)                                   | 289              | 1.10 (4.16)                                   | 1.02 (0.79, 1.32)           |                                         |

<sup>a</sup> Changes presented are from baseline to year 5.

<sup>b</sup> p-values are a test of the ratio of changes at year

UACR = urine albumin to creatinine ratio; 25(OH)D = 25-hydroxyvitamin D; eGFR = estimated glomerular filtration rate; IL-6 = interleukin-6.



ESM Table 6. Effects of vitamin D<sub>3</sub> on serum concentrations of hsCRP across pre-specified subgroups

| Category                                      | Vitamin D <sub>3</sub> |                                               | Placebo          |                                               | Ratio of change<br>(95% CI) | p-value for<br>interaction <sup>b</sup> |
|-----------------------------------------------|------------------------|-----------------------------------------------|------------------|-----------------------------------------------|-----------------------------|-----------------------------------------|
|                                               | N at<br>baseline       | Geometric<br>mean (SD)<br>change <sup>a</sup> | N at<br>baseline | Geometric<br>mean (SD)<br>change <sup>a</sup> |                             |                                         |
| Overall                                       |                        | 0.93 (2.69)                                   |                  | 1.02 (3.04)                                   | 0.91 (0.80, 1.03)           |                                         |
| Race                                          |                        |                                               |                  |                                               |                             |                                         |
| White                                         | 451                    | 0.94 (2.67)                                   | 406              | 1.05 (3.23)                                   | 0.90 (0.77, 1.05)           | 0.88                                    |
| Black                                         | 148                    | 0.89 (2.52)                                   | 130              | 0.93 (2.55)                                   | 0.97 (0.74, 1.27)           |                                         |
| Baseline UACR<br>(mg/mmol Cr)                 |                        |                                               |                  |                                               |                             |                                         |
| < 3                                           | 627                    | 0.92 (2.64)                                   | 557              | 0.99 (3.02)                                   | 0.93 (0.81, 1.07)           | 0.18                                    |
| ≥ 3                                           | 75                     | 0.98 (3.05)                                   | 52               | 1.43 (3.08)                                   | 0.69 (0.46, 1.05)           |                                         |
| Baseline 25(OH)D<br>(nmol/l)                  |                        |                                               |                  |                                               |                             |                                         |
| < 50                                          | 128                    | 0.84 (2.63)                                   | 98               | 0.91 (2.74)                                   | 0.91 (0.67, 1.26)           | 0.84                                    |
| 50 to < 75                                    | 244                    | 0.91 (2.60)                                   | 212              | 1.05 (3.06)                                   | 0.87 (0.71, 1.06)           |                                         |
| ≥ 75                                          | 300                    | 0.98 (2.78)                                   | 275              | 1.04 (3.13)                                   | 0.94 (0.78, 1.14)           |                                         |
| Baseline eGFR<br>(ml/min/1.73m <sup>2</sup> ) |                        |                                               |                  |                                               |                             |                                         |
| ≥ 60                                          | 612                    | 0.94 (2.59)                                   | 531              | 1.01 (3.00)                                   | 0.94 (0.82, 1.07)           | 0.23                                    |
| < 60                                          | 89                     | 0.84 (3.36)                                   | 76               | 1.15 (3.27)                                   | 0.74 (0.51, 1.08)           |                                         |
| Body mass index<br>(kg/m <sup>2</sup> )       |                        |                                               |                  |                                               |                             |                                         |
| < 25                                          | 87                     | 0.93 (2.91)                                   | 87               | 1.17 (3.21)                                   | 0.80 (0.57, 1.12)           | 0.70                                    |
| 25 to < 30                                    | 228                    | 0.95 (2.68)                                   | 205              | 1.03 (3.14)                                   | 0.92 (0.74, 1.15)           |                                         |
| ≥ 30                                          | 364                    | 0.91 (2.64)                                   | 294              | 0.98 (2.91)                                   | 0.93 (0.79, 1.11)           |                                         |
| Baseline hsCRP<br>(mg/l)                      |                        |                                               |                  |                                               |                             |                                         |
| < 1.2                                         | 234                    | 1.38 (2.36)                                   | 192              | 1.65 (2.52)                                   | 0.84 (0.68, 1.04)           | 0.74                                    |
| 1.2 to < 3.4                                  | 230                    | 0.97 (2.49)                                   | 214              | 1.03 (2.98)                                   | 0.93 (0.76, 1.15)           |                                         |
| ≥ 3.4                                         | 235                    | 0.59 (2.71)                                   | 201              | 0.64 (3.01)                                   | 0.93 (0.73, 1.19)           |                                         |
| <i>n</i> -3 fatty acid<br>randomization       |                        |                                               |                  |                                               |                             |                                         |
| Placebo                                       | 333                    | 1.04 (2.70)                                   | 320              | 1.04 (3.11)                                   | 1.00 (0.82, 1.22)           | 0.21                                    |
| <i>n</i> -3 FA                                | 370                    | 0.83 (2.64)                                   | 289              | 1.00 (2.96)                                   | 0.84 (0.70, 1.01)           |                                         |

<sup>a</sup> Changes presented are from baseline to year 5.

<sup>b</sup> p-values are a test of the ratio of changes at year 5.

UACR = urine albumin to creatinine ratio; 25(OH)D = 25-hydroxyvitamin D; eGFR = estimated glomerular filtration rate; hsCRP = high-sensitivity C-reactive protein.

ESM Table 7. Effects of vitamin D<sub>3</sub> on serum concentrations of NT-proBNP across pre-specified subgroups

| Category                                   | Vitamin D <sub>3</sub> |                                         | Placebo       |                                         | Ratio of change (95% CI) | p-value for interaction <sup>b</sup> |
|--------------------------------------------|------------------------|-----------------------------------------|---------------|-----------------------------------------|--------------------------|--------------------------------------|
|                                            | N at baseline          | Geometric mean (SD) change <sup>a</sup> | N at baseline | Geometric mean (SD) change <sup>a</sup> |                          |                                      |
| Overall                                    |                        | 1.72 (3.27)                             |               | 1.39 (3.00)                             | 1.24 (1.09, 1.41)        |                                      |
| Race                                       |                        |                                         |               |                                         |                          |                                      |
| White                                      | 451                    | 1.64 (3.06)                             | 406           | 1.40 (2.91)                             | 1.17 (1.00, 1.38)        | 0.47                                 |
| Black                                      | 148                    | 1.87 (3.57)                             | 130           | 1.30 (3.32)                             | 1.43 (1.07, 1.90)        |                                      |
| Baseline UACR (mg/mmol Cr)                 |                        |                                         |               |                                         |                          |                                      |
| < 3                                        | 627                    | 1.66 (3.22)                             | 557           | 1.38 (2.97)                             | 1.19 (1.04, 1.37)        | 0.16                                 |
| ≥ 3                                        | 75                     | 2.39 (3.52)                             | 52            | 1.42 (3.38)                             | 1.67 (1.08, 2.57)        |                                      |
| Baseline 25(OH)D (nmol/l)                  |                        |                                         |               |                                         |                          |                                      |
| < 50                                       | 128                    | 2.37 (3.60)                             | 98            | 1.37 (3.28)                             | 1.74 (1.26, 2.41)        | 0.06                                 |
| 50 to < 75                                 | 244                    | 1.71 (3.06)                             | 212           | 1.44 (3.04)                             | 1.19 (0.95, 1.49)        |                                      |
| ≥ 75                                       | 300                    | 1.52 (3.23)                             | 275           | 1.36 (2.88)                             | 1.12 (0.93, 1.34)        |                                      |
| Baseline eGFR (ml/min/1.73m <sup>2</sup> ) |                        |                                         |               |                                         |                          |                                      |
| ≥ 60                                       | 612                    | 1.65 (3.23)                             | 531           | 1.35 (2.94)                             | 1.22 (1.07, 1.40)        | 0.55                                 |
| < 60                                       | 89                     | 2.30 (3.39)                             | 76            | 1.65 (3.40)                             | 1.38 (0.95, 2.00)        |                                      |
| Body mass index (kg/m <sup>2</sup> )       |                        |                                         |               |                                         |                          |                                      |
| < 25                                       | 87                     | 1.63 (3.22)                             | 87            | 1.31 (2.42)                             | 1.25 (0.89, 1.74)        | 0.67                                 |
| 25 to < 30                                 | 228                    | 1.58 (3.06)                             | 205           | 1.38 (3.18)                             | 1.15 (0.93, 1.42)        |                                      |
| ≥ 30                                       | 364                    | 1.84 (3.41)                             | 294           | 1.42 (3.06)                             | 1.30 (1.08, 1.56)        |                                      |
| Baseline NT-proBNP (ng/l)                  |                        |                                         |               |                                         |                          |                                      |
| < 150                                      | 254                    | 2.66 (3.36)                             | 182           | 2.24 (3.04)                             | 1.18 (0.95, 1.47)        | 0.95                                 |
| 150 to < 450                               | 210                    | 1.60 (3.12)                             | 221           | 1.35 (2.80)                             | 1.19 (0.97, 1.48)        |                                      |
| ≥ 450                                      | 236                    | 1.15 (2.81)                             | 203           | 0.93 (2.70)                             | 1.24 (1.00, 1.54)        |                                      |
| <i>n</i> -3 fatty acid randomization       |                        |                                         |               |                                         |                          |                                      |
| Placebo                                    | 333                    | 1.67 (3.32)                             | 320           | 1.42 (3.06)                             | 1.18 (0.99, 1.41)        | 0.43                                 |
| <i>n</i> -3 FA                             | 370                    | 1.77 (3.22)                             | 289           | 1.35 (2.94)                             | 1.30 (1.09, 1.57)        |                                      |

<sup>a</sup> Changes presented are from baseline to year 5.

<sup>b</sup> p-values are a test of the ratio of changes at year 5.

UACR = urine albumin to creatinine ratio; 25(OH)D = 25-hydroxyvitamin D; eGFR = estimated glomerular filtration rate; NT-proBNP = N-terminal pro-B-type natriuretic peptide.

ESM Table 8. Effects of *n*-3 fatty acids on serum concentrations of IL-6 across pre-specified subgroups

| Category                                | <i>n</i> -3 fatty acids |                                               | Placebo   |                                               | Ratio of change<br>(95% CI) | p-value for<br>interaction <sup>b</sup> |
|-----------------------------------------|-------------------------|-----------------------------------------------|-----------|-----------------------------------------------|-----------------------------|-----------------------------------------|
|                                         | N at<br>baseline        | Geometric<br>mean (SD)<br>change <sup>a</sup> | N placebo | Geometric<br>mean (SD)<br>change <sup>a</sup> |                             |                                         |
| Overall                                 |                         | 1.10 (4.31)                                   |           | 1.02 (4.58)                                   | 1.08 (0.89, 1.31)           |                                         |
| Baseline<br>EPA+DHA index<br>(%)        |                         |                                               |           |                                               |                             |                                         |
| ≤ 2.2                                   | 332                     | 1.04 (3.86)                                   | 347       | 0.92 (5.03)                                   | 1.13 (0.87, 1.47)           | 0.68                                    |
| > 2.2                                   | 308                     | 1.18 (4.80)                                   | 292       | 1.12 (4.13)                                   | 1.04 (0.80, 1.37)           |                                         |
| Baseline UACR<br>(mg/mmol Cr)           |                         |                                               |           |                                               |                             |                                         |
| < 3                                     | 590                     | 1.11 (4.35)                                   | 594       | 1.02 (4.68)                                   | 1.07 (0.88, 1.31)           | 0.83                                    |
| ≥ 3                                     | 68                      | 1.06 (4.00)                                   | 59        | 0.94 (3.63)                                   | 1.15 (0.60, 2.21)           |                                         |
| Baseline fish intake                    |                         |                                               |           |                                               |                             |                                         |
| < 1.5<br>servings/wk                    | 354                     | 1.11 (4.41)                                   | 329       | 0.99 (4.13)                                   | 1.13 (0.87, 1.45)           | 0.66                                    |
| ≥ 1.5<br>servings/wk                    | 295                     | 1.09 (4.22)                                   | 310       | 1.04 (5.00)                                   | 1.03 (0.77, 1.38)           |                                         |
| Body mass index<br>(kg/m <sup>2</sup> ) |                         |                                               |           |                                               |                             |                                         |
| < 25                                    | 94                      | 0.87 (3.72)                                   | 80        | 1.08 (4.28)                                   | 0.79 (0.48, 1.30)           | 0.38                                    |
| 25 to < 30                              | 213                     | 1.12 (3.70)                                   | 220       | 1.00 (5.20)                                   | 1.12 (0.81, 1.54)           |                                         |
| ≥ 30                                    | 328                     | 1.16 (4.89)                                   | 330       | 1.01 (4.27)                                   | 1.16 (0.89, 1.51)           |                                         |
| Baseline IL-6<br>(pg/ml)                |                         |                                               |           |                                               |                             |                                         |
| < 0.8                                   | 226                     | 1.64 (2.97)                                   | 239       | 1.62 (2.94)                                   | 1.00 (0.74, 1.36)           | 0.45                                    |
| 0.8 to < 1.3                            | 203                     | 1.22 (3.04)                                   | 193       | 1.20 (3.36)                                   | 1.00 (0.73, 1.38)           |                                         |
| ≥ 1.3                                   | 226                     | 0.68 (6.49)                                   | 215       | 0.52 (6.77)                                   | 1.31 (0.93, 1.84)           |                                         |
| Vitamin D<br>randomization              |                         |                                               |           |                                               |                             |                                         |
| Placebo                                 | 289                     | 1.10 (4.16)                                   | 320       | 1.07 (4.69)                                   | 1.01 (0.77, 1.32)           | 0.49                                    |
| Vitamin D                               | 370                     | 1.10 (4.44)                                   | 333       | 0.96 (4.47)                                   | 1.15 (0.89, 1.50)           |                                         |

<sup>a</sup> Changes presented are from baseline to year 5.

<sup>b</sup> p-values are a test of the ratio of changes at year 5.

EPA = eicosapentaenoic acid; DHA = docosahexaenoic acid; UACR = urine albumin to creatinine ratio; IL-6 = interleukin-6.

ESM Table 9. Effects of *n*-3 fatty acids on serum concentrations of hsCRP across pre-specified subgroups

| Category                             | <i>n</i> -3 fatty acids |                                         | Placebo       |                                         | Ratio of change (95% CI) | p-value for interaction <sup>b</sup> |
|--------------------------------------|-------------------------|-----------------------------------------|---------------|-----------------------------------------|--------------------------|--------------------------------------|
|                                      | N at baseline           | Geometric mean (SD) change <sup>a</sup> | N at baseline | Geometric mean (SD) change <sup>a</sup> |                          |                                      |
| Overall                              |                         | 0.90 (2.79)                             |               | 1.04 (2.90)                             | 0.87 (0.76, 0.98)        |                                      |
| Baseline EPA+DHA index (%)           |                         |                                         |               |                                         |                          |                                      |
| ≤ 2.2                                | 332                     | 0.88 (2.64)                             | 347           | 1.05 (2.97)                             | 0.84 (0.71, 0.99)        | 0.62                                 |
| > 2.2                                | 308                     | 0.92 (2.96)                             | 292           | 1.03 (2.84)                             | 0.89 (0.75, 1.06)        |                                      |
| Baseline UACR (mg/mmol Cr)           |                         |                                         |               |                                         |                          |                                      |
| < 3                                  | 590                     | 0.89 (2.75)                             | 594           | 1.02 (2.88)                             | 0.87 (0.77, 0.99)        | 0.75                                 |
| ≥ 3                                  | 68                      | 1.04 (3.13)                             | 59            | 1.28 (3.04)                             | 0.81 (0.54, 1.22)        |                                      |
| Baseline fish intake                 |                         |                                         |               |                                         |                          |                                      |
| < 1.5 servings/wk                    | 354                     | 0.94 (2.87)                             | 329           | 1.01 (2.82)                             | 0.91 (0.77, 1.08)        | 0.40                                 |
| ≥ 1.5 servings/wk                    | 295                     | 0.87 (2.71)                             | 310           | 1.07 (2.97)                             | 0.82 (0.68, 0.98)        |                                      |
| Body mass index (kg/m <sup>2</sup> ) |                         |                                         |               |                                         |                          |                                      |
| < 25                                 | 94                      | 0.92 (2.92)                             | 80            | 1.20 (3.22)                             | 0.76 (0.55, 1.07)        | 0.73                                 |
| 25 to < 30                           | 213                     | 0.92 (2.86)                             | 220           | 1.05 (2.92)                             | 0.86 (0.70, 1.07)        |                                      |
| ≥ 30                                 | 328                     | 0.89 (2.72)                             | 330           | 1.00 (2.80)                             | 0.89 (0.75, 1.07)        |                                      |
| Baseline hsCRP (mg/l)                |                         |                                         |               |                                         |                          |                                      |
| < 1.2                                | 207                     | 1.41 (2.43)                             | 219           | 1.59 (2.44)                             | 0.89 (0.73, 1.08)        | 0.97                                 |
| 1.2 to < 3.4                         | 226                     | 0.93 (2.75)                             | 218           | 1.08 (2.69)                             | 0.86 (0.70, 1.05)        |                                      |
| ≥ 3.4                                | 223                     | 0.58 (2.66)                             | 213           | 0.65 (3.04)                             | 0.89 (0.70, 1.12)        |                                      |
| Vitamin D randomization              |                         |                                         |               |                                         |                          |                                      |
| Placebo                              | 289                     | 1.00 (2.96)                             | 320           | 1.04 (3.11)                             | 0.96 (0.79, 1.16)        | 0.21                                 |
| Vitamin D                            | 370                     | 0.83 (2.64)                             | 333           | 1.04 (2.70)                             | 0.80 (0.67, 0.95)        |                                      |

<sup>a</sup> Changes presented are from baseline to year 5.

<sup>b</sup> p-values are a test of the ratio of changes at year 5.

EPA = eicosapentaenoic acid; DHA = docosahexaenoic acid; UACR = urine albumin to creatinine ratio; hsCRP = high-sensitivity C-reactive protein.

ESM Table 10. Effects of *n*-3 fatty acids on serum concentrations of NT-proBNP across pre-specified subgroups

| Category                             | <i>n</i> -3 fatty acids |                                         | Placebo       |                                         | Ratio of change (95% CI) | p-value for interaction <sup>b</sup> |
|--------------------------------------|-------------------------|-----------------------------------------|---------------|-----------------------------------------|--------------------------|--------------------------------------|
|                                      | N at baseline           | Geometric mean (SD) change <sup>a</sup> | N at baseline | Geometric mean (SD) change <sup>a</sup> |                          |                                      |
| Overall                              |                         | 1.57 (3.12)                             |               | 1.54 (3.20)                             | 1.02 (0.89, 1.17)        |                                      |
| Baseline EPA+DHA index (%)           |                         |                                         |               |                                         |                          |                                      |
| ≤ 2.2                                | 332                     | 1.63 (3.16)                             | 347           | 1.48 (3.18)                             | 1.10 (0.91, 1.33)        | 0.23                                 |
| > 2.2                                | 308                     | 1.52 (3.08)                             | 292           | 1.61 (3.22)                             | 0.94 (0.79, 1.13)        |                                      |
| Baseline UACR (mg/mmol Cr)           |                         |                                         |               |                                         |                          |                                      |
| < 3                                  | 590                     | 1.51 (3.05)                             | 594           | 1.54 (3.18)                             | 0.98 (0.85, 1.13)        | 0.10                                 |
| ≥ 3                                  | 68                      | 2.29 (3.54)                             | 59            | 1.59 (3.47)                             | 1.43 (0.93, 2.20)        |                                      |
| Baseline fish intake                 |                         |                                         |               |                                         |                          |                                      |
| < 1.5 servings/wk                    | 354                     | 1.60 (3.05)                             | 329           | 1.55 (3.13)                             | 1.01 (0.85, 1.20)        | 0.86                                 |
| ≥ 1.5 servings/wk                    | 295                     | 1.55 (3.19)                             | 310           | 1.54 (3.27)                             | 1.03 (0.86, 1.24)        |                                      |
| Body mass index (kg/m <sup>2</sup> ) |                         |                                         |               |                                         |                          |                                      |
| < 25                                 | 94                      | 1.49 (2.61)                             | 80            | 1.42 (3.09)                             | 1.05 (0.75, 1.48)        | 0.60                                 |
| 25 to < 30                           | 213                     | 1.42 (3.02)                             | 220           | 1.54 (3.22)                             | 0.93 (0.74, 1.16)        |                                      |
| ≥ 30                                 | 328                     | 1.70 (3.33)                             | 330           | 1.58 (3.22)                             | 1.08 (0.89, 1.31)        |                                      |
| Baseline NT-proBNP (ng/l)            |                         |                                         |               |                                         |                          |                                      |
| < 150                                | 204                     | 2.36 (3.26)                             | 232           | 2.59 (3.21)                             | 0.91 (0.73, 1.13)        | 0.28                                 |
| 150 to < 450                         | 225                     | 1.57 (2.84)                             | 206           | 1.37 (3.09)                             | 1.14 (0.92, 1.41)        |                                      |
| ≥ 450                                | 227                     | 1.10 (2.91)                             | 212           | 0.99 (2.62)                             | 1.11 (0.89, 1.38)        |                                      |
| Vitamin D randomization              |                         |                                         |               |                                         |                          |                                      |
| Placebo                              | 289                     | 1.35 (2.94)                             | 320           | 1.42 (3.06)                             | 0.96 (0.79, 1.16)        | 0.43                                 |
| Vitamin D                            | 370                     | 1.77 (3.22)                             | 333           | 1.67 (3.32)                             | 1.06 (0.89, 1.26)        |                                      |

<sup>a</sup> Changes presented are from baseline to year 5.

<sup>b</sup> p-values are a test of the ratio of changes at year 5.

EPA = eicosapentaenoic acid; DHA = docosahexaenoic acid; UACR = urine albumin to creatinine ratio; NT-proBNP = N-terminal pro-B-type natriuretic peptide.

ESM Fig. 1. Correlation between IL-6, hsCRP, and NT-proBNP measurements after immediate processing versus upon processing after being frozen for 24 hours

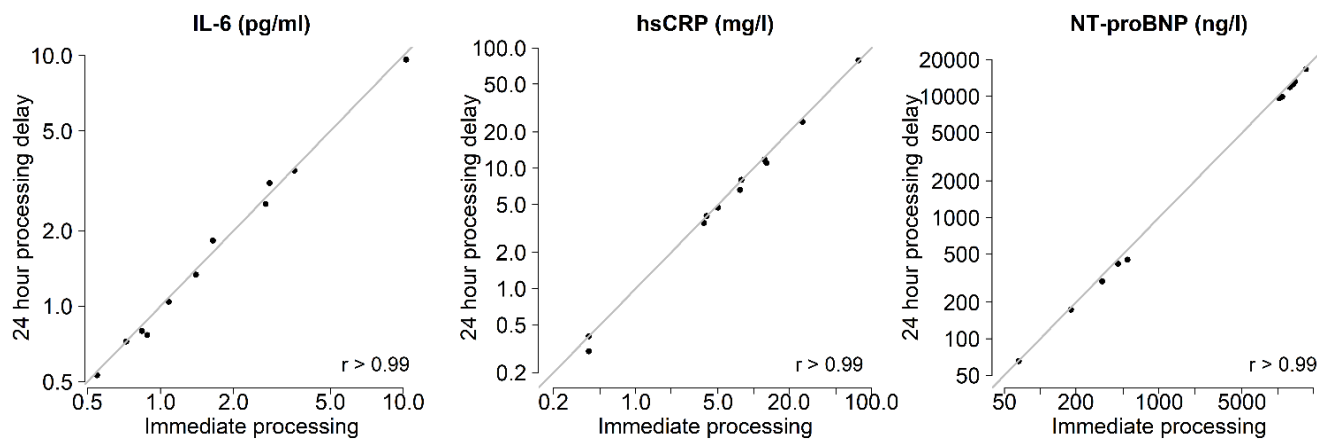

IL-6 = interleukin-6; hsCRP = high-sensitivity C-reactive protein; NT-proBNP = N-terminal pro-B-type natriuretic peptide.

ESM Fig. 2. CONSORT Flow Diagram for the Vitamin D and Omega-3 Trial to Prevent and Treat Diabetic Kidney Disease (VITAL-DKD)

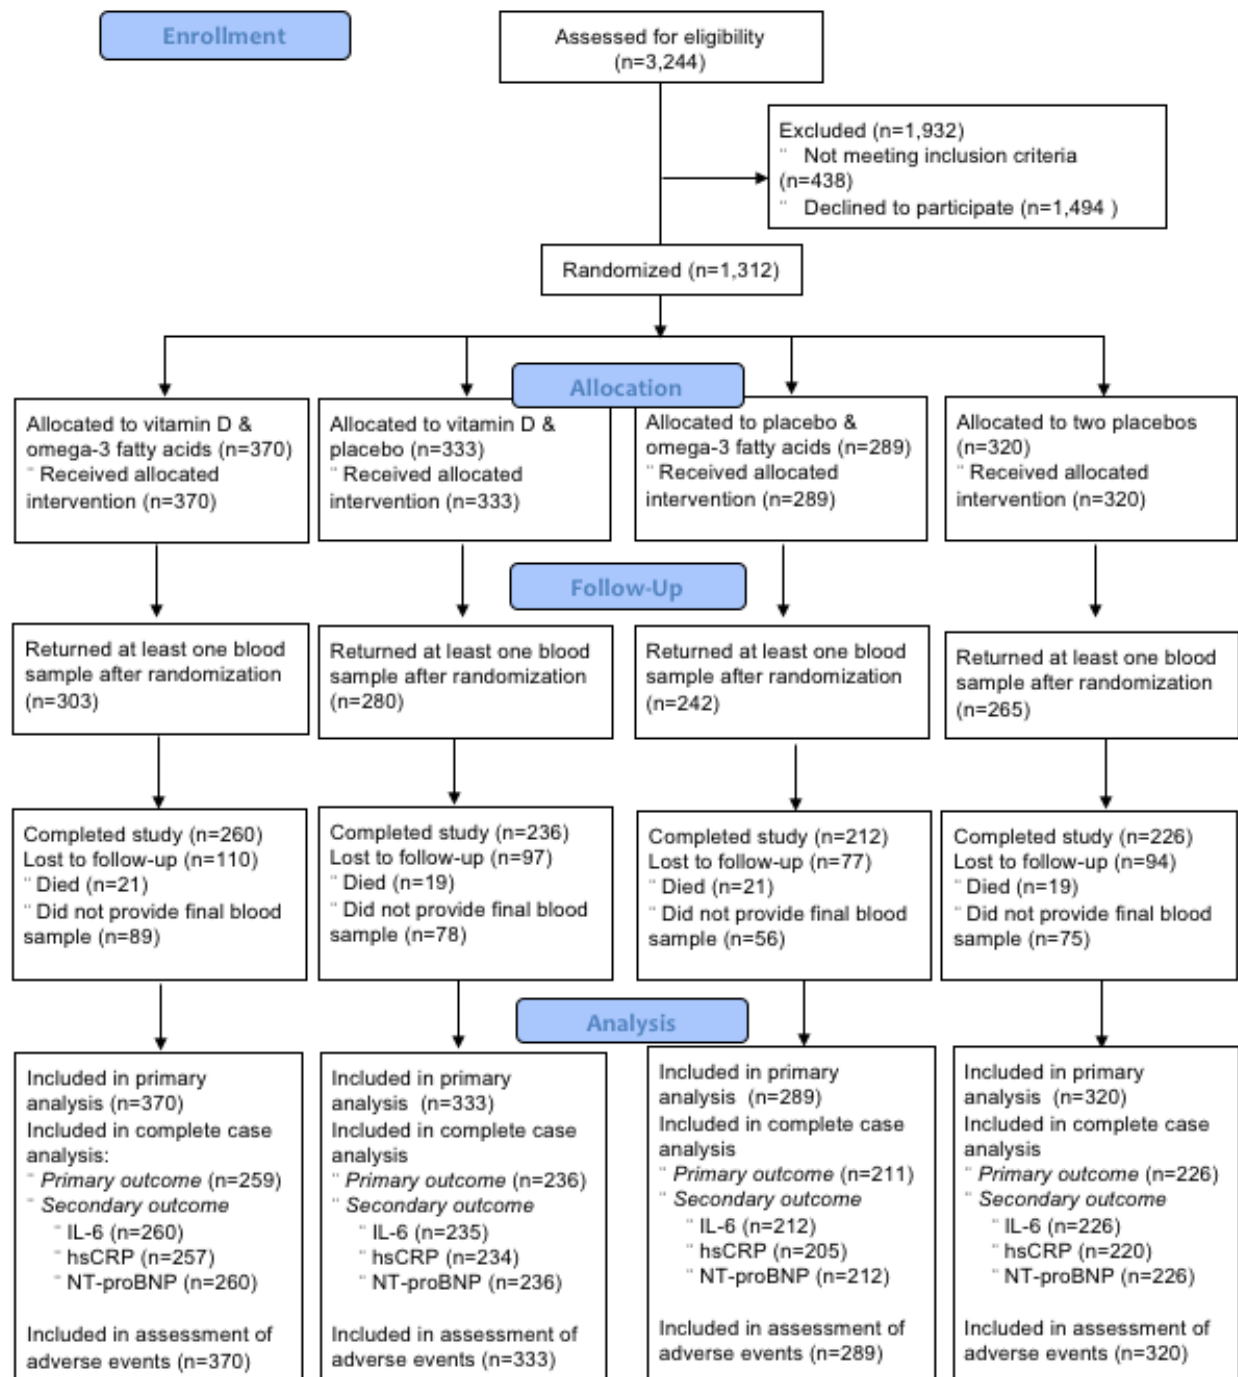

ESM Fig. 3. Forest plot depicting effects of vitamin D<sub>3</sub> on serum concentrations of IL-6 across pre-specified subgroups (corresponding to ESM Table 5)

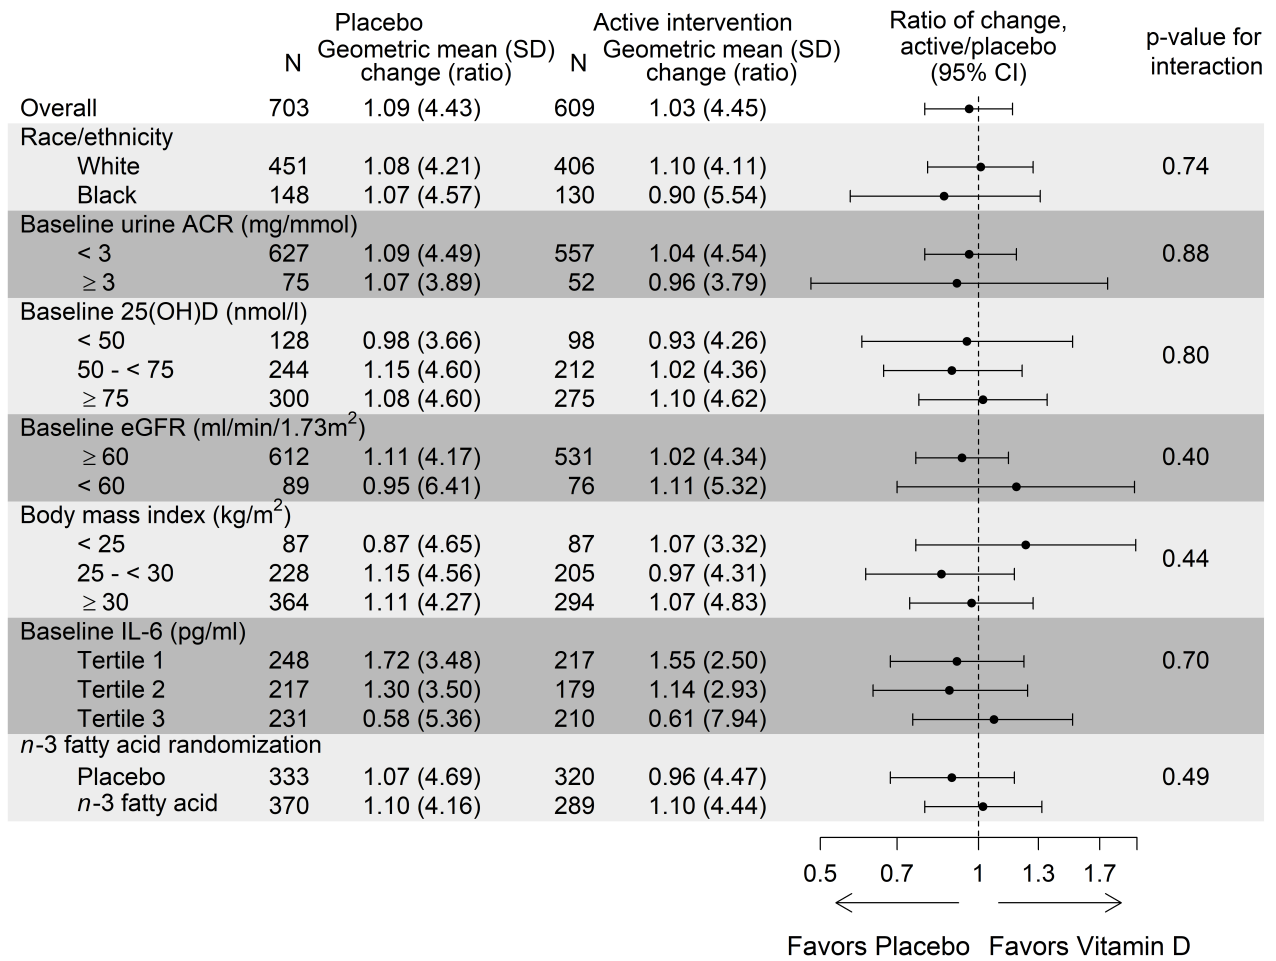

ACR = albumin to creatinine ratio; 25(OH)D = 25-hydroxyvitamin D; eGFR = estimated glomerular filtration rate; IL-6 = interleukin-6.











ESM Fig. 8. Forest plot depicting effects of *n*-3 fatty acids on serum concentrations of NT-proBNP across pre-specified subgroups (corresponding to ESM Table 10)

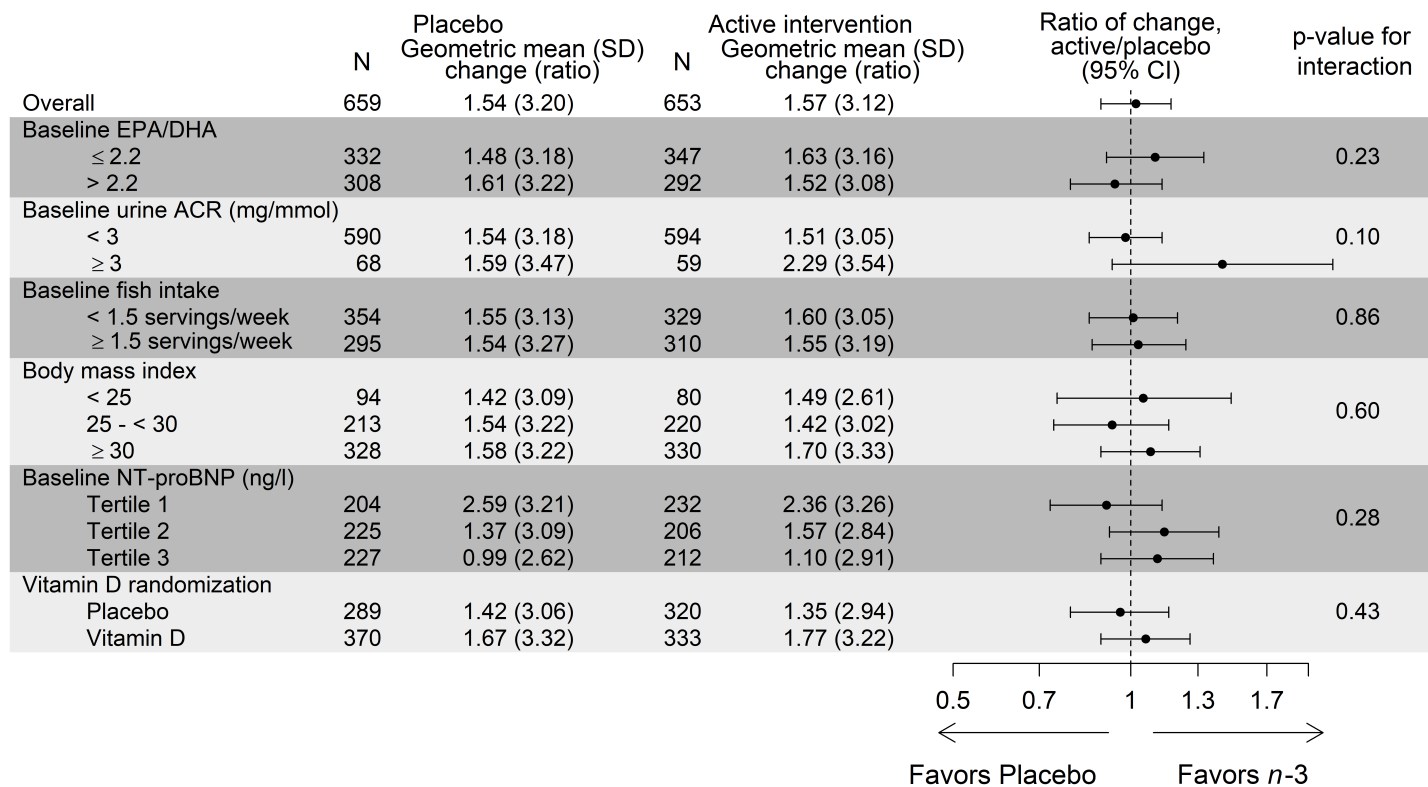

EPA = eicosapentaenoic acid; DHA = docosahexaenoic acid; ACR = urine to albumin creatinine ratio; NT-proBNP = N-terminal pro-B-type natriuretic peptide.
